# Supplementary material for: Polypyrrole nanocomposites doped with functional ionic liquids for high performance supercapacitors
Source: Royal Society of Chemistry journal article supplement (doi:10.1039/c7nj04367h), 2018-01-01
Supplement: c7nj04367h1.pdf [file c7nj04367h1.pdf]

**Polypyrrole nanocomposites doped by functional ionic liquids for high performance  
supercapacitors**

Peng Cao,<sup>1</sup> Yuxia Fan,<sup>1</sup> Junrui Yu,<sup>1</sup> Rongmin Wang,<sup>1</sup> Pengfei Song,<sup>1</sup> Yubing Xiong<sup>\*1,2</sup>

<sup>1</sup> College of Chemistry and Chemical Engineering, Northwest Normal University, Lanzhou  
730070, China

<sup>2</sup> Department of Chemistry, Zhejiang Sci-Tech University, Hangzhou 310018, China

\* Author to whom correspondence should be addressed; E-Mail: [yubing\\_xiong@163.com](mailto:yubing_xiong@163.com); Tel.:  
+86-931-7970-358; Fax: +86-931-7970-075.

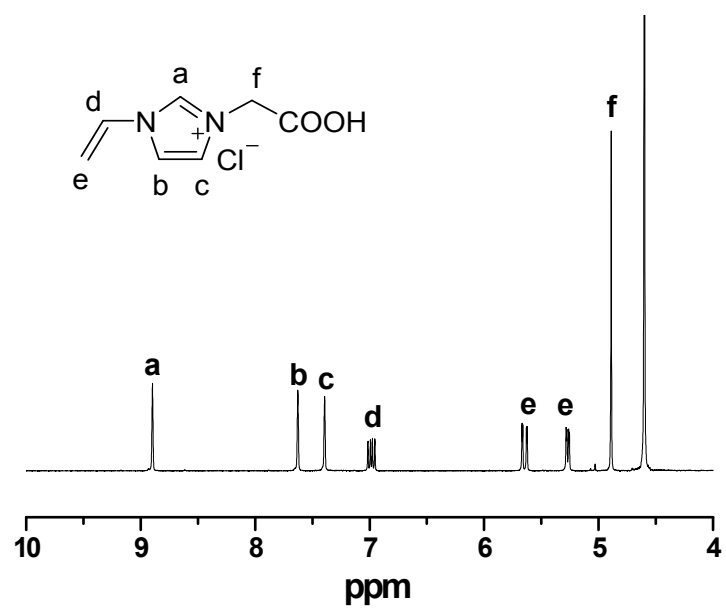

Figure S1 <sup>1</sup>H NMR spectrum of [VCMIIm]Cl in D<sub>2</sub>O.

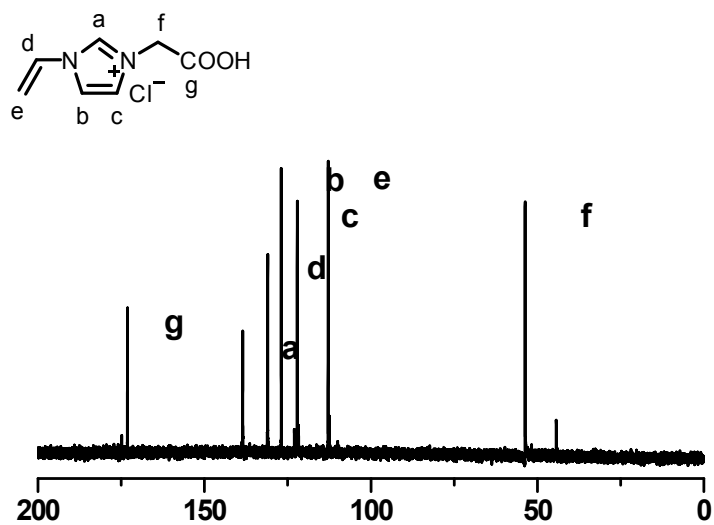

Figure S2 <sup>13</sup>C NMR spectrum of [VCMIIm]Cl in D<sub>2</sub>O.

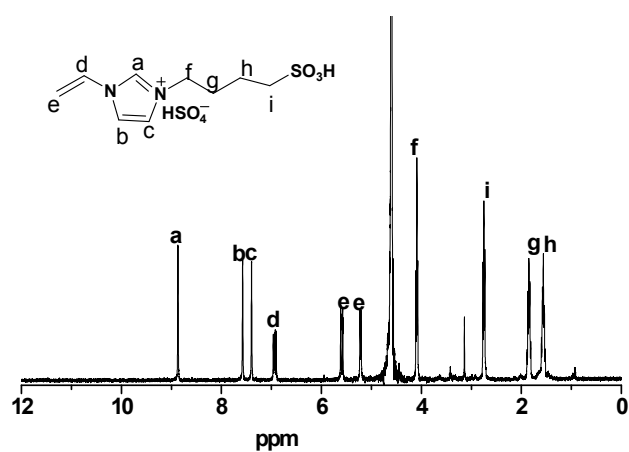

**Figure S3**  $^1\text{H}$  NMR spectrum of  $[\text{SBVIm}][\text{HSO}_4]$  in  $\text{D}_2\text{O}$ .

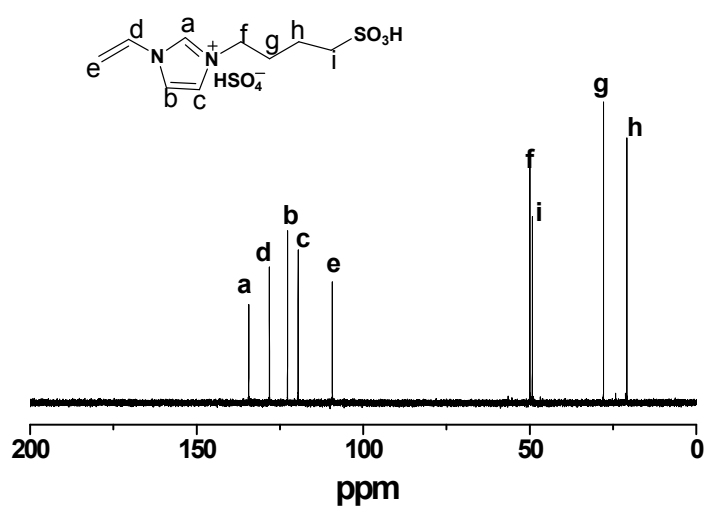

**Figure S4**  $^{13}\text{C}$  NMR spectrum of  $[\text{SBVIm}][\text{HSO}_4]$  in  $\text{D}_2\text{O}$ .

**Table S1** Element composition of IL@PPy nanocomposites measured by energy dispersive spectrometer (EDS).

| Entry  | $[\text{VCMIm}]\text{Cl} : \text{Py} : \text{FeCl}_3$                 | C %   | N%    | O %   | Cl%          |
|--------|-----------------------------------------------------------------------|-------|-------|-------|--------------|
| 1V1P1F | 1:1:1                                                                 | 62.31 | 17.57 | 11.77 | 7.39         |
| 3V1P1F | 3:1:1                                                                 | 64.65 | 15.95 | 12.01 | 7.66         |
| 4V1P1F | 4:1:1                                                                 | 65.07 | 15.63 | 11.64 | 8.35         |
| 3S1P1F | 3:1:1<br>$([\text{SBVIm}][\text{HSO}_4] : \text{Py} : \text{FeCl}_3)$ | 59.01 | 16.20 | 19.10 | 5.69<br>(S%) |

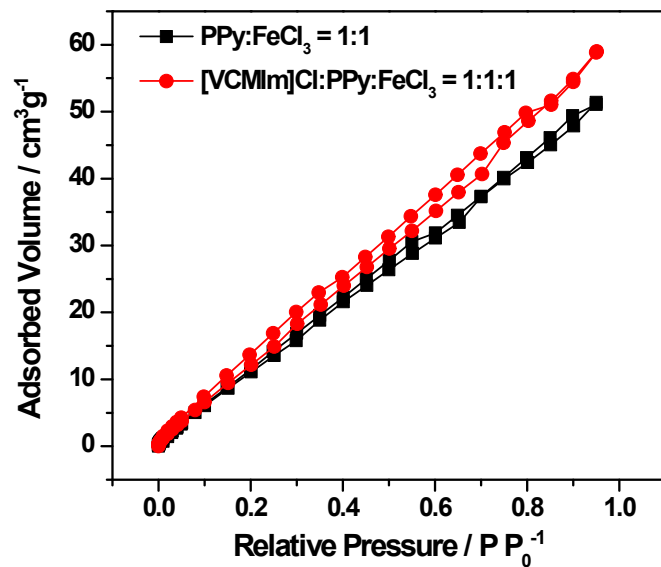

**Figure S5.** N<sub>2</sub> adsorption-desorption isotherms of pure PPy nanoparticles and IL@PPy nanocomposites. The specific surface areas of PPy:FeCl<sub>3</sub>=1:1 and [VCMIm]Cl:PPy:FeCl<sub>3</sub>=1:1:1 are 73.8 m<sup>2</sup> g<sup>-1</sup> and 80.1 m<sup>2</sup> g<sup>-1</sup> respectively.

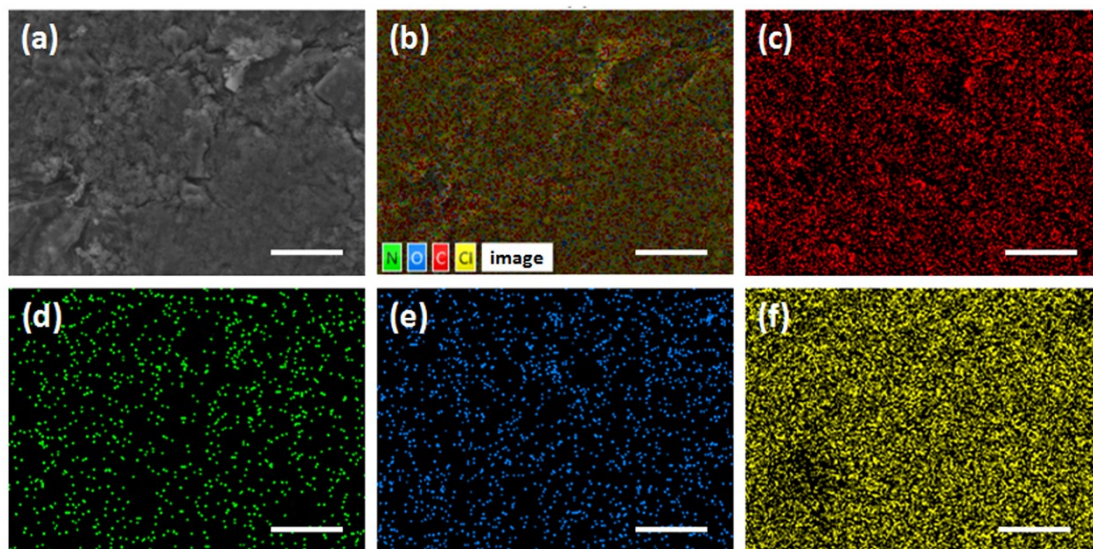

**Figure S6.** SEM mapping photograph of C, N, O and Cl elements within [VCMIm]Cl@PPy (3:1:1) All the scale bars are 50 μm.

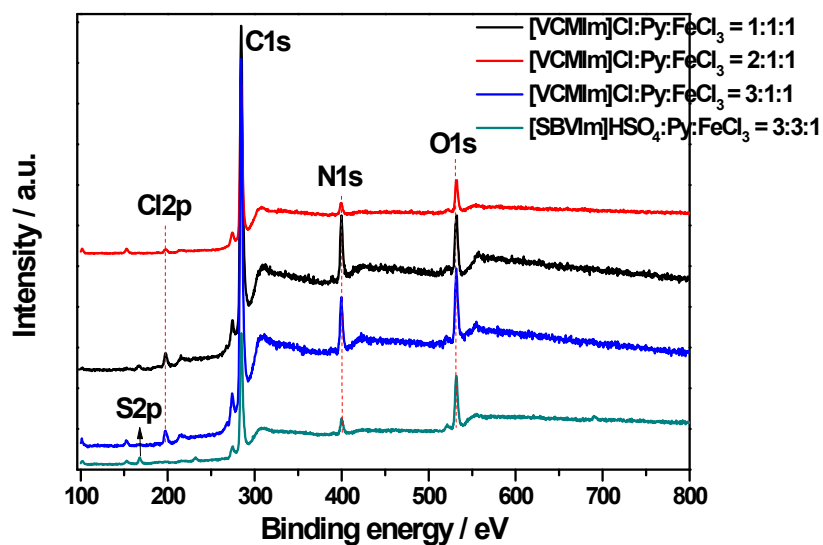

**Figure S7.** XPS survey scans of IL@PPy nanocomposites indicating the existence of carbon, oxygen, nitrogen, chlorine and sulfur.

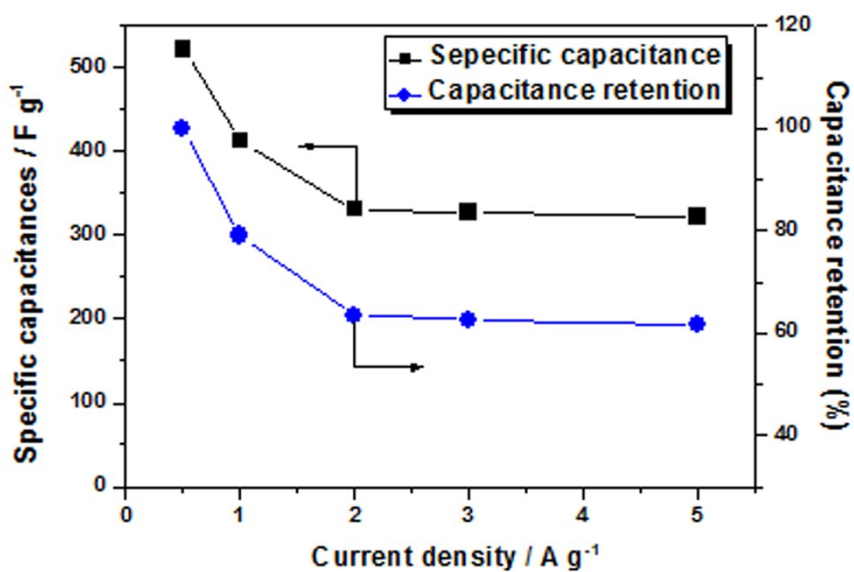

**Figure S8.** Specific capacitances and capacitance retention at various current densities.

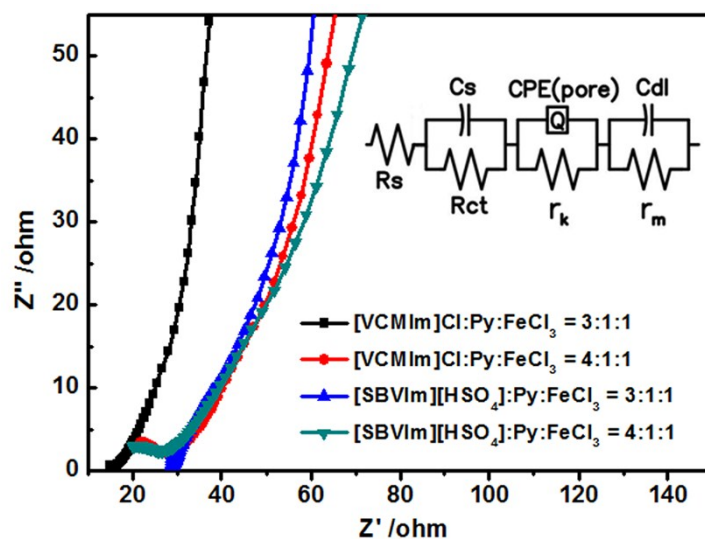

**Figure S9.** Nyquist plots of the IL-doped PPy. Inset: equivalent circuit used to fit the impedance spectrum.

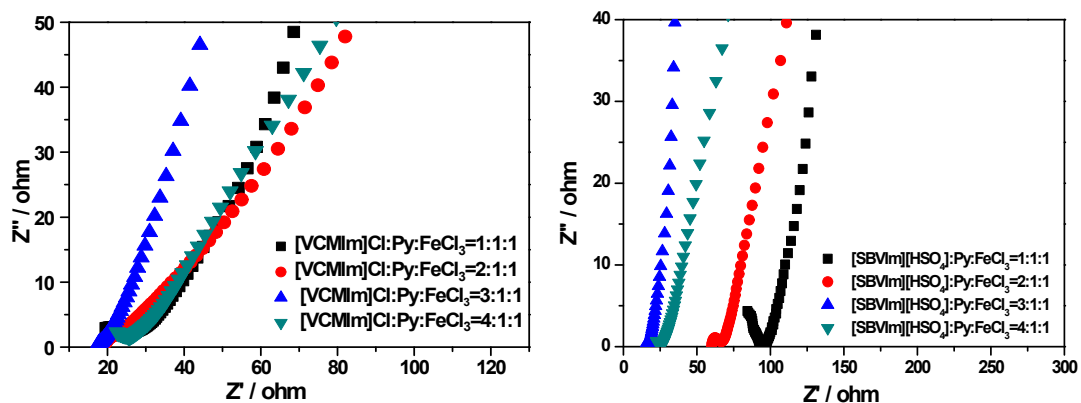

**Figure S10.** EIS curves of IL@PPy electrode materials with different composition.

Table S2 Fitted EIS parameters of symmetric supercapacitors based on the IL-doped PPy electrodes.

| Electrode materials                                           | Ratio | $R_s$ ( $\Omega$ ) | $R_{ct}$ ( $\Omega$ ) |
|---------------------------------------------------------------|-------|--------------------|-----------------------|
| [VCMIm]Cl:Py:FeCl <sub>3</sub>                                | 3:1:1 | 1.03               | 0.09                  |
| [VCMIm]Cl:Py:FeCl <sub>3</sub>                                | 4:1:1 | 1.38               | 0.42                  |
| [SBVIm][H <sub>2</sub> SO <sub>4</sub> ]:Py:FeCl <sub>3</sub> | 3:1:1 | 2.04               | 0.43                  |
| [SBVIm][H <sub>2</sub> SO <sub>4</sub> ]:Py:FeCl <sub>3</sub> | 4:1:1 | 1.32               | 0.40                  |

**Table S3** Power and energy density of the electrode materials based PPy composites

| CPs-based composites         | Power density      | Energy density      | Reference        |
|------------------------------|--------------------|---------------------|------------------|
|                              | W Kg <sup>-1</sup> | Wh Kg <sup>-1</sup> |                  |
| PPy-MnO <sub>2</sub>         | 901.7              | 25.8                | 1                |
| CNT-PPy-MnO <sub>2</sub> -AC | 100                | 38.42               | 2                |
| PPy/MO-2h                    | 467.0              | 19.4                | 3                |
| PPy-LGS                      | -                  | 20.6                | 4                |
| PPy coated fabric            | 799.2              | 11.1                | 5                |
| Ag-PPy                       | 500                | 30                  | 6                |
| GF-CNTs-PPy                  | 2700               | 6.2                 | 7                |
| PPy-Graphene                 | 3200               | 8.4                 | 8                |
| [VCMIm]Cl-PPy(3:1)           | 2226               | 40.2                | <b>This work</b> |

**Table S4** Specific capacitance of IL@PPy in this work, in comparison with several representative results with different dopants from recent publications.

| Electrode material | Specific Capacitance  | Scan rate or current density | Electrolyte                           | reference |
|--------------------|-----------------------|------------------------------|---------------------------------------|-----------|
| PPy-20 wt% MWNTs   | 506 F g <sup>-1</sup> | 5 mVs <sup>-1</sup>          | 1 M H <sub>2</sub> SO <sub>4</sub>    | 9         |
| RGO/PPy            | 352 F g <sup>-1</sup> | 1 A/g                        | 1 M H <sub>2</sub> SO <sub>4</sub>    | 10        |
| PPy/TSA            | 376 F g <sup>-1</sup> | 3 mA m <sup>-2</sup>         | 0.5 M Na <sub>2</sub> SO <sub>4</sub> | 11        |
| PPy hydrogel-CC    | 400 F g <sup>-1</sup> | 0.2 A/g                      | 1 M H <sub>2</sub> SO <sub>4</sub>    | 12        |

|          |                         |                        |                                       |                  |
|----------|-------------------------|------------------------|---------------------------------------|------------------|
| CTAB@PPy | 305 F g <sup>-1</sup>   | 0.5 A/g                | 1 M KCl                               | 13               |
| s-G/PPy  | 310 F g <sup>-1</sup>   | 0.3 A/g                | 1 M KCl                               | 14               |
| AQDS/NDA | 393 F g <sup>-1</sup>   | 0.5 A/g                | 1 M H <sub>2</sub> SO <sub>4</sub>    | 15               |
| PPy/GNS  | 298.2 F g <sup>-1</sup> | 0.5 A g <sup>-1</sup>  | 1 M H <sub>2</sub> SO <sub>4</sub>    | 16               |
| R-G/Pys  | 180 F g <sup>-1</sup>   | 0.5 mA/g               | 1 M H <sub>2</sub> SO <sub>4</sub>    | 17               |
| HNTs/PPy | 522 F g <sup>-1</sup>   | 5 mA cm <sup>-2</sup>  | 0.5 M Na <sub>2</sub> SO <sub>4</sub> | 18               |
| PPy      | 533 F g <sup>-1</sup>   | 5 mV s <sup>-1</sup>   | 0.5 M H <sub>2</sub> SO <sub>4</sub>  | 19               |
| GO/PPy   | 650 F g <sup>-1</sup>   | 0.45 A g <sup>-1</sup> | 1 M H <sub>2</sub> SO <sub>4</sub>    | 20               |
| GO/PPy   | 633 F g <sup>-1</sup>   | 1 A g <sup>-1</sup>    | 1 M KCl                               | 21               |
| IL@PPy   | 520 F g <sup>-1</sup>   | 0.5 A/g                | 1 M KCl                               | <b>This work</b> |

## Reference

1. W. D. He, C. G. Wang, F. W. Zhuge, X. L. Deng, X. J. Xua, T.Y. Zhai. *Nano Energy*, 2017, **35**, 242–250.
2. Y. J. Zhou, H. Zhao, X.M. Mu, *Nanoscale*, 2015, **7**, 14697–14706.
3. J. Xu, D. X. Wang, L. L. Fan, Y. Yuan, W. Wei, R. N. Liu, S. J. Gu, W. L. Xu, *Organic Electronics*, 2015, **26**, 292–299
4. L. Zhu, L. Wu, Y. Sun, M. Li, J. Xu, Z. Bai, G. Liang, L. Liu, D. Fang, W. Xu, *RSC Adv*, 2014, **4** 6261–6266.
5. B. Yue, C. Wang, X. Ding, G.G. Wallace, *Electrochimica Acta*, 2012, **68**, 18–24
6. L. Yuan, C. Wan, X. Ye, *Electrochimica Acta*, 2016, **213**, 115–123.
7. Y. H. Lee, H.J. Choi, M.S. Kim, S. Noh, K. Ahn, K. Im, O. Kwon, H. Yoon, *Scientific Reports*, 2016, **6**, 19822.
8. L.J. Lei, Z.L. Li, W.H. Bin, L.J. Yi, S.Z. Xiang, L.X. David, *Energy&Environmental Science*, 2014, **7**, 3709–3719
9. V. Khomenko, E. Frackowiak, F. Beguin, *Electrochimica Acta*, 2005, **50**, 2499–2506.
10. H. H Chang, C. K. Chang, Y. C. Tsai, C. S. Liao, *Carbon*, 2012, **50**, 2331–2336.
11. Z. H. Dong, Y. Li. Wei, W. Shi, G. A. Zhang, *Materials Chemistry and Physics*, 2011, **131**, 529–534.



12. Y. Shi, L. J. Pan, B. R. Liu, Y. Q. Wang, Y. Cui, Z. A. Bao and G. H. Yu, *Journal of Materials Chemistry A*, 2014, **2**, 6086–6091.
13. Q.F. Wu, K.X. He, H.Y. Mi, X.G. Zhang, *Materials Chemistry and Physics*, 2007, **101**, 367–371.
14. X.P. Zuo, Y.L. Zhang, L. Si, B. Zhou, B. Zhao, L.H. Zhu, X.Q. Jiang, *Journal of Alloys and Compounds*, 2016, **688**, 140–148.
15. Y.Q. Han, X.X. Gao, T.Q. Wang, M.S. He, T.X. Li, W.J. Li, *Synthetic Metals*, 2016, **217**, 288–294.
16. D.C. Zhang, X. Zhang, Y. Chen, P. Yu, C.H. Wang, Y.W. Ma, *Journal of Power Sources*, 2011, **196**, 5990–5996.
17. Y.Q. Han, L. Hao, X.G. Zhang, *Synthetic Metals*, 2010, **160**, 2336–2340.
18. C. Yang, P. Liu, Y.Q. Zhao, *Electrochimica Acta*, 2010, **55**, 6857–6864.
19. D.P. Dubal, S.V. Patil, A.D. Jagadale, C.D. Lokhande, *Journal of Alloys and Compounds*, 2011, **509**, 8183–8188.
20. Y. Liu, H.H. Wang, J. Zhou, L.Y. Bian, E.W. Zhu, J.F. Hai, J. Tang, W.H. Tang, *Electrochimica Acta*, 2013, **112**, 44–52.
21. J. Li, H.Q. Xie, *Materials Letters*, 2012, **78**, 106–109.
